# Supplementary material
Source: publisher site journal article supplement (https://www.dovepress.com/article/436046)
Supplement: Supplementary file 1 [file get_supplementary_file.php]

**Supplementary material**

**Obesity patterns, metabolic abnormality, and diabetic kidney disease in patients with type 2 diabetes**

Kun Zhang1, Wen Zhang1, Fangzhen Xia1, Ningjian Wang1, Yingli Lu1, Chunhua Sui1, Bin Wang1

1 Institute and Department of Endocrinology and Metabolism, Shanghai Ninth People’s Hospital, Shanghai Jiao Tong University School of Medicine, Shanghai, China

**Supplementary Table 1**.Characteristics of the study population by BMI and WHR categories.

**Supplementary Table 2**. Prevalence ratios (95% CIs) of DKD according to metabolic status across BMI and WHR categories.

**Supplementary Table 3**. Association of BMI categories and metabolic status with prevalent DKD by subgroups.

**Supplementary Table 4**. Association of WHR categories and metabolic status with prevalent DKD by subgroups.

**Supplementary Table 5**. Prevalence ratios (95% CIs) of DKD according to waist circumference categories.

**Supplementary Table 6**. Association of waist circumference categories and metabolic status with prevalent DKD.

**Supplementary Table 7**. Associations of BMI and WHR categories and metabolic status with prevalent DKD after excluding individuals with CVD or excluding individuals with retinopathy.

**Supplementary Figure 1**. Flow chart of study population.

**Supplementary Figure 2**.Associations of BMI and WHR with prevalent DKD.

| **Supplementary Table 1**. Characteristics of the study population by BMI and WHR categories. | | | | | | | | |
| --- | --- | --- | --- | --- | --- | --- | --- | --- |
|  | BMI, kg/m2 | | |  | WHR (male/female) | | |  |
|  | <24 | 24-27.9 | ≥28 | *P*trend | <0.90/0.85 | 0.90-0.94/0.85-0.89 | ≥0.95/0.90 | *P*trend |
| No. of participants | 1723 | 1619 | 737 |  | 1019 | 1376 | 1684 |  |
| Age, years | 67.6 ± 8.5 | 67.5 ± 8.5 | 66.1 ± 9.3 | <0.001 | 66.8 ± 8.8 | 67.2 ± 8.2 | 67.7 ± 8.9 | 0.006 |
| Female, n (%) | 971 (56.4) | 809 (50.0) | 416 (56.5) | 0.30 | 439 (43.1) | 656 (47.7) | 1101 (65.4) | <0.001 |
| Current smoker, n (%) | 312 (18.1) | 304 (18.8) | 110 (14.9) | 0.14 | 213 (20.9) | 257 (18.7) | 256 (15.2) | <0.001 |
| Current drinker, n (%) | 257 (14.9) | 296 (18.3) | 129 (17.5) | 0.036 | 190 (18.6) | 255 (18.5) | 237 (14.1) | <0.001 |
| High school education  or above, n (%) | 904 (52.5) | 817 (50.5) | 354 (48.0) | 0.040 | 570 (55.9) | 703 (51.1) | 802 (47.6) | <0.001 |
|  |  |  |  |  |  |  |  |
| Duration of diabetes, years | 10 (4-15) | 8 (4-14) | 8 (3-12) | <0.001 | 8 (4-14) | 8 (4-15) | 9 (4-15) | 0.13 |
| Use of medications, n (%) |  |  |  |  |  |  |  |  |
| Antidiabetic drugs | 1242 (72.1) | 1146 (70.8) | 540 (73.3) | 0.79 | 692 (67.9) | 1009 (73.3) | 1227 (72.9) | 0.012 |
| Antihypertensive drugs | 639 (37.1) | 759 (46.9) | 399 (54.1) | <0.001 | 373 (36.6) | 624 (45.3) | 800 (47.5) | <0.001 |
| Lipid lowering drugs | 580 (33.7) | 630 (38.9) | 332 (45.0) | <0.001 | 334 (32.8) | 508 (36.9) | 700 (41.6) | <0.001 |
| Systolic BP, mmHg | 142.3 ± 19.9 | 147.0 ± 19.2 | 147.9 ± 19.4 | <0.001 | 141.6 ± 19.5 | 145.7 ± 19.6 | 146.9 ± 19.7 | <0.001 |
| Diastolic BP, mmHg | 77.0 ± 10.7 | 79.8 ± 10.6 | 81.3 ± 10.7 | <0.001 | 77.9 ± 10.8 | 79.5 ± 10.8 | 79.1 ± 10.7 | 0.019 |
| Triglycerides, mmol/L | 1.34 (0.97-1.93) | 1.64 (1.18-2.31) | 1.79 (1.32-2.42) | <0.001 | 1.26 (0.91-1.89) | 1.53 (1.11-2.21) | 1.68 (1.24-2.33) | <0.001 |
| Total cholesterol, mmol/L | 5.13 ± 1.16 | 5.09 ± 1.22 | 5.10 ± 1.22 | 0.49 | 5.12 ± 1.14 | 5.04 ± 1.21 | 5.16 ± 1.21 | 0.27 |
| LDL-C, mmol/L | 3.15 ± 0.83 | 3.15 ± 0.85 | 3.17 ± 0.87 | 0.67 | 3.15 ± 0.81 | 3.11 ± 0.85 | 3.19 ± 0.86 | 0.16 |
| HDL-C, mmol/L | 1.28 ± 0.32 | 1.16 ± 0.27 | 1.14 ± 0.26 | <0.001 | 1.29 ± 0.34 | 1.18 ± 0.29 | 1.18 ± 0.26 | <0.001 |
| Fasting glucose, mmol/L | 7.7 ± 2.5 | 7.8 ± 2.4 | 7.8 ± 2.3 | 0.16 | 7.5 ± 2.4 | 7.7 ± 2.3 | 7.9 ± 2.5 | <0.001 |
| HbA1c, % | 7.4 ± 1.5 | 7.5 ± 1.3 | 7.5 ± 1.3 | 0.34 | 7.3 ± 1.4 | 7.4 ± 1.4 | 7.6 ± 1.4 | <0.001 |
| C-peptide, ng/mL | 1.36 ± 0.65 | 1.75 ± 0.82 | 2.04 ± 0.86 | <0.001 | 1.37 ± 0.67 | 1.61 ± 0.76 | 1.81 ± 0.85 | <0.001 |
| Fasting insulin, pmol/L | 39.4 (28.5-58.1) | 52.9 (38.4-75.4) | 70.2 (50.1-98.3) | <0.001 | 38.5 (27.3-57.7) | 48.9 (34.6-70.6) | 58.3 (40.4-84.7) | <0.001 |
| BMI, kg/m2 | 21.8 ± 1.7 | 25.8 ± 1.1 | 30.4 ± 2.4 | <0.001 | 22.9 ± 3.1 | 24.8 ± 3.1 | 26.3 ± 3.6 | <0.001 |
| Waist circumference, cm | 83.2 ± 6.8 | 92.4 ± 6.2 | 101.9 ± 8.4 | <0.001 | 82.1 ± 7.9 | 89.5 ± 7.1 | 95.7 ± 8.9 | <0.001 |
| WHR | 0.89 ± 0.06 | 0.92 ± 0.06 | 0.95 ± 0.07 | <0.001 | 0.84 ± 0.04 | 0.90 ± 0.03 | 0.97 ± 0.05 | <0.001 |
| eGFR, mL/min/1.73 m2 | 88.1 ± 15.3 | 86.4 ± 16.1 | 87.3 ± 16.3 | 0.063 | 88.1 ± 15.3 | 87.4 ± 15.8 | 86.7 ± 16.1 | 0.027 |
| UACR, mg/g | 11.5 (6.9-23.9) | 13.5 (7.5-30.5) | 17.2 (9.1-42.1) | <0.001 | 10.5 (6.2-21.6) | 12.7 (7.4-27.4) | 15.6 (8.4-37.3) | <0.001 |
| Data are presented as mean ± SD, median (interquartile range), or number (percentage). | | | | | | | | |
| BMI, body mass index; BP: blood pressure; eGFR: estimated glomerular filtration rate; HbA1c, glycated hemoglobin; HDL-C, high-density lipoprotein cholesterol; LDL-C, low-density lipoprotein cholesterol; UACR, urinary albumin-to-creatinine ratio; WHR, waist-to-hip ratio. | | | | | | | | |
|

| **Supplementary Table 2**. Prevalence ratios (95% CIs) for DKD according to metabolic status across BMI and WHR categories. | | | | | | | | |
| --- | --- | --- | --- | --- | --- | --- | --- | --- |
|  | 0-1 metabolic abnormality | |  | 2 metabolic abnormalities | |  | 3 metabolic abnormalities | |
|  | PR (95% CI)a | *P* value |  | PR (95% CI) | *P* value |  | PR (95% CI) | *P* value |
| Overall | 1 (reference) |  |  | 1.30 (1.14-1.48) | <0.001 |  | 1.65 (1.45-1.87) | <0.001 |
| BMI, kg/m2 |  |  |  |  |  |  |  |  |
| <24 | 1 (reference) |  |  | 1.44 (1.17-1.78) | <0.001 |  | 1.72 (1.39-2.13) | <0.001 |
| 24-27.9 | 1 (reference) |  |  | 1.09 (0.89-1.34) | 0.40 |  | 1.34 (1.10-1.63) | 0.004 |
| ≥28 | 1 (reference) |  |  | 1.05 (0.79-1.40) | 0.75 |  | 1.32 (1.01-1.74) | 0.045 |
| WHR |  |  |  |  |  |  |  |  |
| <0.90/0.85 (male/female) | 1 (reference) |  |  | 1.51 (1.16-1.97) | 0.002 |  | 1.52 (1.13-2.04) | 0.006 |
| 0.90-0.94/0.85-0.89 | 1 (reference) |  |  | 1.16 (0.92-1.45) | 0.22 |  | 1.49 (1.18-1.87) | <0.001 |
| ≥0.95/0.90 | 1 (reference) |  |  | 1.23 (1.01-1.49) | 0.042 |  | 1.63 (1.35-1.96) | <0.001 |
| BMI, body mass index; CI, confidence interval; DKD, diabetic kidney disease; PR, prevalence ratio.  aThe model was adjusted for age, sex, education, smoking status, alcohol drinking, diabetes duration, HbA1c, use of  antidiabetic agents. | | | | | | | | |

| **Supplementary Table 3**. Association of BMI categories and metabolic status with prevalent DKD by subgroups. | | | | | | | | |
| --- | --- | --- | --- | --- | --- | --- | --- | --- |
|  | 0-1 metabolic abnormality | |  | 2 metabolic abnormalities | |  | 3 metabolic abnormalities | |
|  | PR (95% CI)a | *P* value |  | PR (95% CI) | *P* value |  | PR (95% CI) | *P* value |
| **Male (n=1883)** |  |  |  |  |  |  |  |  |
| <24 | 1 (reference) |  |  | 1.76 (1.31-2.36) | <0.001 |  | 1.48 (1.03-2.12) | 0.035 |
| 24-27.9 | 1.56 (1.15-2.10) | 0.004 |  | 1.59 (1.19-2.11) | 0.001 |  | 1.71 (1.27-2.30) | <0.001 |
| ≥28 | 2.07 (1.44-2.98) | <0.001 |  | 2.15 (1.56-2.96) | <0.001 |  | 2.35 (1.67-3.31) | <0.001 |
| **Female (n=2196)** |  |  |  |  |  |  |  |  |
| <24 | 1 (reference) |  |  | 1.10 (0.81-1.49) | 0.56 |  | 1.68 (1.27-2.22) | <0.001 |
| 24-27.9 | 1.10 (0.77-1.57) | 0.61 |  | 1.32 (0.98-1.77) | 0.072 |  | 1.86 (1.42-2.44) | <0.001 |
| ≥28 | 1.54 (0.96-2.45) | 0.071 |  | 1.63 (1.17-2.25) | 0.003 |  | 2.36 (1.80-3.11) | <0.001 |
| **Age ≤65 years (n=1721)** |  |  |  |  |  |  |  |  |
| <24 | 1 (reference) |  |  | 1.56 (1.06-2.30) | 0.023 |  | 1.78 (1.17-2.72) | 0.007 |
| 24-27.9 | 1.38 (0.89-2.15) | 0.15 |  | 2.08 (1.43-3.03) | <0.001 |  | 2.22 (1.53-3.21) | <0.001 |
| ≥28 | 2.11 (1.22-3.66) | 0.007 |  | 2.16 (1.40-3.34) | <0.001 |  | 2.89 (1.97-4.23) | <0.001 |
| **Age >65 years (n=2358)** |  |  |  |  |  |  |  |  |
| <24 | 1 (reference) |  |  | 1.33 (1.03-1.71) | 0.027 |  | 1.56 (1.21-2.00) | <0.001 |
| 24-27.9 | 1.28 (0.98-1.66) | 0.069 |  | 1.22 (0.95-1.56) | 0.11 |  | 1.66 (1.31-2.11) | <0.001 |
| ≥28 | 1.67 (1.19-2.34) | 0.003 |  | 1.77 (1.36-2.31) | <0.001 |  | 2.15 (1.68-2.77) | <0.001 |
| **HbA1c <7% (n=1691)** |  |  |  |  |  |  |  |  |
| <24 | 1 (reference) |  |  | 1.43 (0.99-2.05) | 0.054 |  | 1.76 (1.21-2.56) | 0.003 |
| 24-27.9 | 1.38 (0.93-2.07) | 0.11 |  | 1.57 (1.11-2.23) | 0.012 |  | 1.44 (0.98-2.11) | 0.064 |
| ≥28 | 1.48 (0.84-2.63) | 0.18 |  | 1.72 (1.13-2.62) | 0.011 |  | 2.21 (1.46-3.32) | <0.001 |
| **HbA1c ≥7% (n=2388)** |  |  |  |  |  |  |  |  |
| <24 | 1 (reference) |  |  | 1.35 (1.04-1.76) | 0.025 |  | 1.55 (1.19-2.02) | 0.001 |
| 24-27.9 | 1.27 (0.96-1.67) | 0.097 |  | 1.36 (1.05-1.75) | 0.020 |  | 1.97 (1.55-2.49) | <0.001 |
| ≥28 | 1.96 (1.40-2.74) | <0.001 |  | 1.89 (1.44-2.48) | <0.001 |  | 2.41 (1.88-3.09) | <0.001 |
| BMI, body mass index; CI, confidence interval; DKD, diabetic kidney disease; PR, prevalence ratio. | | | | | | | | |
| aThe model was adjusted for age, sex, education, smoking status, alcohol drinking, diabetes duration, HbA1c, use of antidiabetic agents, and WHR. The strata variable was not included in the model when stratifying by itself. BMI <24 kg/m2 with 0-1 metabolic abnormality was used as the reference group. | | | | | | | | |
|

| **Supplementary Table 4**. Association of WHR categories and metabolic status with prevalent DKD by subgroups. | | | | | | | | |
| --- | --- | --- | --- | --- | --- | --- | --- | --- |
|  | 0-1 metabolic abnormality | |  | 2 metabolic abnormalities | |  | 3 metabolic abnormalities | |
|  | PR (95% CI)a | *P* value |  | PR (95% CI) | *P* value |  | PR (95% CI) | *P* value |
| **Male (n=1883)** |  |  |  |  |  |  |  |  |
| <0.90 | 1 (reference) |  |  | 1.49 (1.06-2.09) | 0.022 |  | 1.24 (0.81-1.89) | 0.33 |
| 0.90-0.94 | 1.19 (0.85-1.67) | 0.31 |  | 1.42 (1.04-1.94) | 0.029 |  | 1.54 (1.11-2.14) | 0.010 |
| ≥0.95 | 1.34 (0.96-1.89) | 0.089 |  | 1.69 (1.23-2.32) | 0.001 |  | 1.63 (1.17-2.27) | 0.004 |
| **Female (n=2196)** |  |  |  |  |  |  |  |  |
| <0.85 | 1 (reference) |  |  | 1.32 (0.87-2.01) | 0.20 |  | 1.35 (0.88-2.06) | 0.17 |
| 0.85-0.89 | 0.96 (0.62-1.46) | 0.83 |  | 0.99 (0.67-1.47) | 0.97 |  | 1.47 (1.01-2.13) | 0.042 |
| ≥0.90 | 0.93 (0.63-1.39) | 0.73 |  | 1.11 (0.78-1.60) | 0.56 |  | 1.71 (1.22-2.42) | 0.002 |
| **Age ≤65 years (n=1721)** |  |  |  |  |  |  |  |  |
| <0.90/0.85 (male/female) | 1 (reference) |  |  | 2.26 (1.36-3.76) | 0.002 |  | 2.26 (1.33-3.84) | 0.003 |
| 0.90-0.94/0.85-0.89 | 1.56 (0.94-2.60) | 0.088 |  | 1.75 (1.07-2.86) | 0.025 |  | 2.14 (1.33-3.47) | 0.002 |
| ≥0.95/0.90 | 1.57 (0.94-2.62) | 0.085 |  | 2.25 (1.42-3.56) | <0.001 |  | 2.41 (1.52-3.84) | <0.001 |
| **Age >65 years (n=2358)** |  |  |  |  |  |  |  |  |
| <0.90/0.85 (male/female) | 1 (reference) |  |  | 1.15 (0.84-1.58) | 0.38 |  | 1.06 (0.74-1.51) | 0.76 |
| 0.90-0.94/0.85-0.89 | 0.92 (0.67-1.26) | 0.60 |  | 1.03 (0.77-1.37) | 0.84 |  | 1.31 (0.98-1.75) | 0.069 |
| ≥0.95/0.90 | 0.96 (0.71-1.29) | 0.79 |  | 1.10 (0.84-1.45) | 0.49 |  | 1.46 (1.12-1.90) | 0.005 |
| **HbA1c <7% (n=1691)** |  |  |  |  |  |  |  |  |
| <0.90/0.85 (male/female) | 1 (reference) |  |  | 1.41 (0.87-2.27) | 0.16 |  | 0.93 (0.50-1.73) | 0.81 |
| 0.90-0.94/0.85-0.89 | 1.10 (0.68-1.77) | 0.71 |  | 1.34 (0.86-2.08) | 0.19 |  | 1.93 (1.25-2.99) | 0.003 |
| ≥0.95/0.90 | 1.23 (0.77-1.98) | 0.39 |  | 1.64 (1.06-2.53) | 0.025 |  | 1.64 (1.05-2.57) | 0.030 |
| **HbA1c ≥7% (n=2388)** |  |  |  |  |  |  |  |  |
| <0.90/0.85 (male/female) | 1 (reference) |  |  | 1.41 (1.01-1.96) | 0.042 |  | 1.58 (1.12-2.23) | 0.010 |
| 0.90-0.94/0.85-0.89 | 1.09 (0.79-1.51) | 0.61 |  | 1.13 (0.83-1.54) | 0.44 |  | 1.34 (0.98-1.81) | 0.064 |
| ≥0.95/0.90 | 1.13 (0.82-1.55) | 0.45 |  | 1.30 (0.97-1.75) | 0.077 |  | 1.76 (1.33-2.32) | <0.001 |
| CI, confidence interval; DKD, diabetic kidney disease; PR, prevalence ratio; WHR, waist-to-hip ratio. | | | | | | | | |
| aThe model was adjusted for age, sex, education, smoking status, alcohol drinking, diabetes duration, HbA1c, use of antidiabetic agents, and BMI. The strata variable was not included in the model when stratifying by itself. WHR <0.90/0.85 (male/female) with 0-1 metabolic abnormality was used as the reference group. | | | | | | | | |
|

| **Supplementary Table 5**. Prevalence ratios (95% CIs) for CKD according to waist circumference categories. | | | | | | | | | |
| --- | --- | --- | --- | --- | --- | --- | --- | --- | --- |
|  |  | Model 1a | |  | Model 2b | |  | Model 3c | |
| Cases/n | PR (95% CI) | *P* value |  | PR (95% CI) | *P* value |  | PR (95% CI) | *P* value |
| Per 5 cm increase |  | 1.12 (1.09-1.14) | <0.001 |  | 1.09 (1.06-1.11) | <0.001 |  | 1.06 (1.02-1.10) | 0.001 |
| <90.0/85.0 | 327/1478 | 1 (reference) |  |  | 1 (reference) |  |  | 1 (reference) |  |
| (male/female) |  |  |  |  |  |  |  |  |  |
| 90.0-94.9/85.0-89.9 | 226/931 | 1.05 (0.91-1.22) | 0.51 |  | 0.99 (0.85-1.14) | 0.85 |  | 0.93 (0.80-1.09) | 0.37 |
| 95.0-99.9/90.0-94.9 | 227/737 | 1.32 (1.14-1.53) | <0.001 |  | 1.16 (1.00-1.33) | 0.049 |  | 1.04 (0.89-1.22) | 0.63 |
| ≥100.0/95.0 | 342/933 | 1.57 (1.38-1.79) | <0.001 |  | 1.38 (1.22-1.58) | <0.001 |  | 1.16 (0.97-1.39) | 0.11 |
| CI, confidence interval; DKD, diabetic kidney disease; PR, prevalence ratio.  aModel 1 was adjusted for age and sex.  bModel 2 was adjusted for variables in model 1 plus education, smoking status, alcohol drinking, diabetes duration, HbA1c, use of antidiabetic agents, systolic BP, use of antihypertensive agents, HDL-C, and triglycerides.  cModel 3 was adjusted for variables in model 2 and BMI. | | | | | | | | | |

| **Supplementary Table 6**. Association of waist circumference categories and metabolic status with prevalent DKD. | | | | | | | | |
| --- | --- | --- | --- | --- | --- | --- | --- | --- |
|  | 0-1 metabolic abnormality | |  | 2 metabolic abnormalities | |  | 3 metabolic abnormalities | |
|  | PR (95% CI)a | *P* value |  | PR (95% CI) | *P* value |  | PR (95% CI) | *P* value |
| Per 5 cm increase | 1.03 (0.95-1.12) | 0.44 |  | 1.07 (1.02-1.13) | 0.003 |  | 1.06 (1.00-1.12) | 0.041 |
| <90.0/85.0 | 1 (reference) |  |  | 1.38 (1.11-1.73) | 0.004 |  | 1.50 (1.18-1.91) | 0.001 |
| (male/female) |  |  |  |  |  |  |  |  |
| 90.0-94.9/85.0-89.9 | 0.88 (0.65-1.20) | 0.43 |  | 1.16 (0.90-1.49) | 0.26 |  | 1.63 (1.28-2.08) | <0.001 |
| 95.0-99.9/90.0-94.9 | 1.35 (1.00-1.82) | 0.052 |  | 1.35 (1.04-1.75) | 0.023 |  | 1.56 (1.22-1.99) | <0.001 |
| ≥100.0/95.0 | 1.33 (1.00-1.78) | 0.054 |  | 1.47 (1.13-1.90) | 0.004 |  | 1.73 (1.35-2.22) | <0.001 |
| BMI, body mass index; CI, confidence interval; DKD, diabetic kidney disease; PR, prevalence ratio. | | | | | | | | |
| aThe model was adjusted for age, sex, education, smoking status, alcohol drinking, diabetes duration, HbA1c, use of antidiabetic agents, and BMI. Waist circumference <90.0/85.0 cm (male/female) with 0-1 metabolic abnormality was used as the reference group. | | | | | | | | |
|

| **Supplementary Table 7**. Associations of BMI and WHR categories and metabolic status with prevalent DKD after excluding individuals with CVDa or excluding individuals with retinopathy. | | | | | | | | |
| --- | --- | --- | --- | --- | --- | --- | --- | --- |
|  | 0-1 metabolic abnormality | |  | 2 metabolic abnormalities | |  | 3 metabolic abnormalities | |
|  | PR (95% CI)b | *P* value |  | PR (95% CI) | *P* value |  | PR (95% CI) | *P* value |
| **Excluding individuals with CVD (n = 2596)** | | |  |  |  |  |  |  |
| BMI, kg/m2 |  |  |  |  |  |  |  |  |
| Per 1 kg/m2 increase | 1.07 (1.03-1.12) | 0.001 |  | 1.04 (1.01-1.07) | 0.006 |  | 1.03 (1.00-1.06) | 0.022 |
| <24 | 1 (reference) |  |  | 1.54 (1.18-2.02) | 0.002 |  | 1.71 (1.28-2.29) | <0.001 |
| 24-27.9 | 1.44 (1.07-1.93) | 0.016 |  | 1.55 (1.18-2.02) | 0.001 |  | 2.03 (1.56-2.63) | <0.001 |
| ≥28 | 1.74 (1.17-2.58) | 0.006 |  | 2.10 (1.55-2.86) | <0.001 |  | 2.54 (1.91-3.37) | <0.001 |
| WHR |  |  |  |  |  |  |  |  |
| Per 0.10 increase | 1.23 (0.98-1.55) | 0.072 |  | 1.13 (0.90-1.42) | 0.29 |  | 1.23 (1.05-1.45) | 0.012 |
| <0.90/0.85 (male/female) | 1 (reference) |  |  | 1.45 (1.01-2.09) | 0.045 |  | 1.56 (1.04-2.35) | 0.032 |
| 0.90-0.94/0.85-0.89 | 1.21 (0.85-1.72) | 0.28 |  | 1.48 (1.07-2.06) | 0.018 |  | 1.83 (1.31-2.54) | <0.001 |
| ≥0.95/0.90 | 1.34 (0.95-1.89) | 0.096 |  | 1.68 (1.23-2.31) | 0.001 |  | 1.97 (1.43-2.69) | <0.001 |
| **Excluding individuals with retinopathy (n = 3592)** | | | | | |  |  |  |
| BMI, kg/m2 |  |  |  |  |  |  |  |  |
| Per 1 kg/m2 increase | 1.06 (1.02-1.10) | <0.001 |  | 1.05 (1.03-1.08) | <0.001 |  | 1.03 (1.01-1.05) | 0.007 |
| <24 | 1 (reference) |  |  | 1.28 (1.01-1.62) | 0.042 |  | 1.57 (1.25-1.99) | <0.001 |
| 24-27.9 | 1.34 (1.05-1.72) | 0.021 |  | 1.46 (1.17-1.82) | <0.001 |  | 1.85 (1.50-2.29) | <0.001 |
| ≥28 | 1.72 (1.25-2.37) | 0.001 |  | 1.84 (1.44-2.35) | <0.001 |  | 2.36 (1.88-2.97) | <0.001 |
| WHR |  |  |  |  |  |  |  |  |
| Per 0.10 increase | 1.17 (0.96-1.43) | 0.12 |  | 1.02 (0.85-1.23) | 0.80 |  | 1.26 (1.11-1.42) | <0.001 |
| <0.90/0.85 (male/female) | 1 (reference) |  |  | 1.47 (1.10-1.98) | 0.010 |  | 1.19 (0.84-1.67) | 0.33 |
| 0.90-0.94/0.85-0.89 | 1.08 (0.80-1.45) | 0.63 |  | 1.15 (0.87-1.52) | 0.32 |  | 1.54 (1.17-2.03) | 0.002 |
| ≥0.95/0.90 | 1.15 (0.86-1.54) | 0.34 |  | 1.31 (1.00-1.71) | 0.051 |  | 1.74 (1.35-2.25) | <0.001 |
| BMI, body mass index; CI, confidence interval; DKD, diabetic kidney disease; CVD, cardiovascular disease; PR, prevalence ratio; WHR, waist-to-hip ratio. | | | | | | | | |
| aCVD refers to a composite of coronary heart disease and stroke. | | | | | | | | |
| bThe model was adjusted for age, sex, education, smoking status, alcohol drinking, diabetes duration, HbA1c, use of antidiabetic agents, and WHR (or BMI). BMI <24 kg/m2 or WHR <0.90/0.85 (male/female) with 0-1 metabolic abnormality was used as the reference group, respectively. | | | | | | | | |
|

**
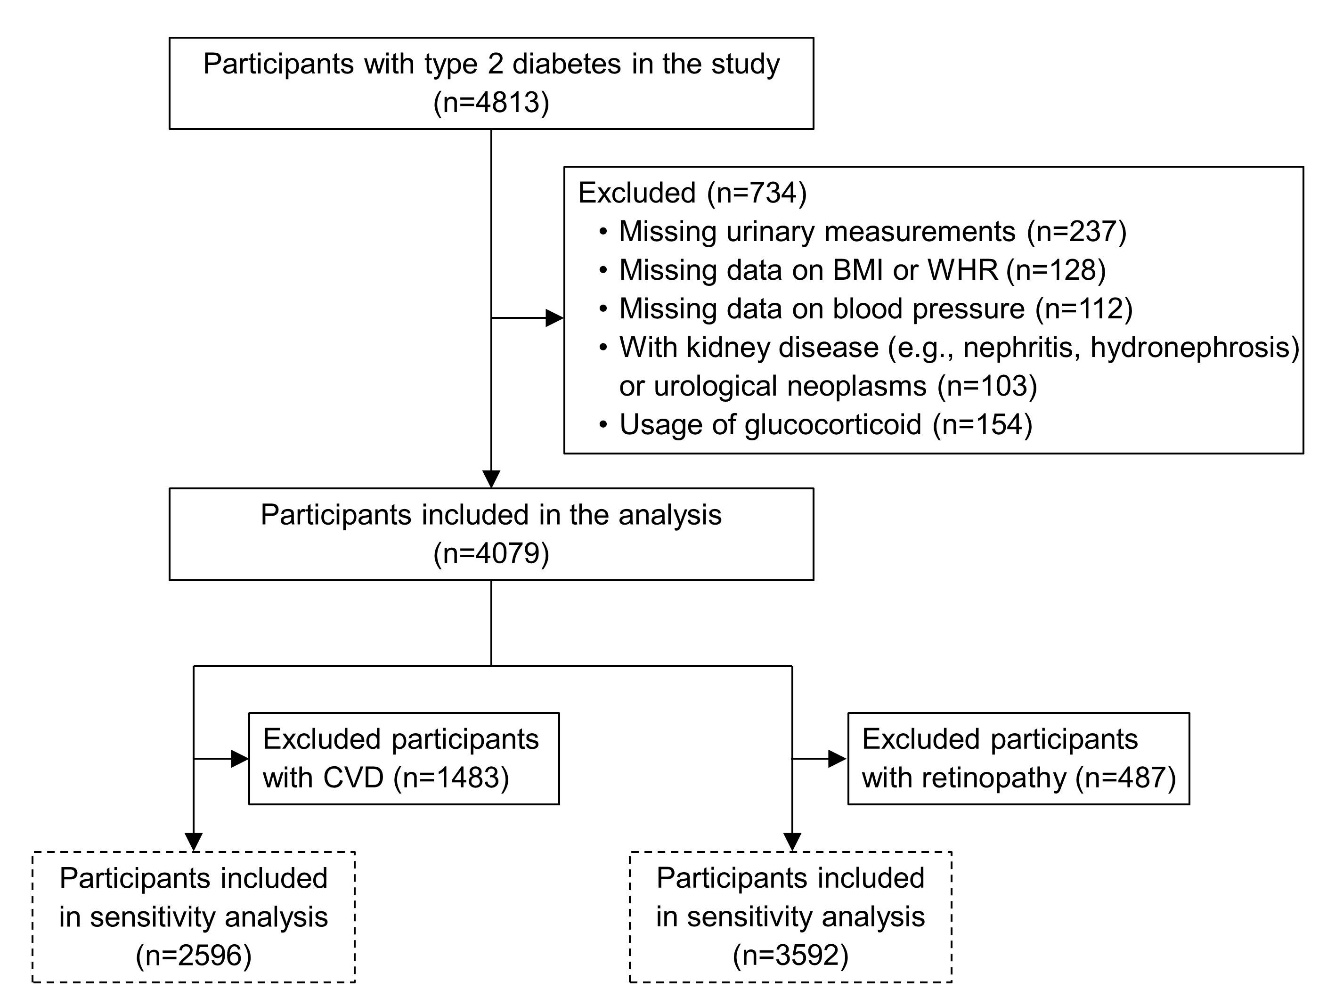
**

**Supplementary Figure 1**. Flow chart of study population. BMI, body mass index; CVD, cardiovascular disease; WHR, waist-to-hip ratio.

**
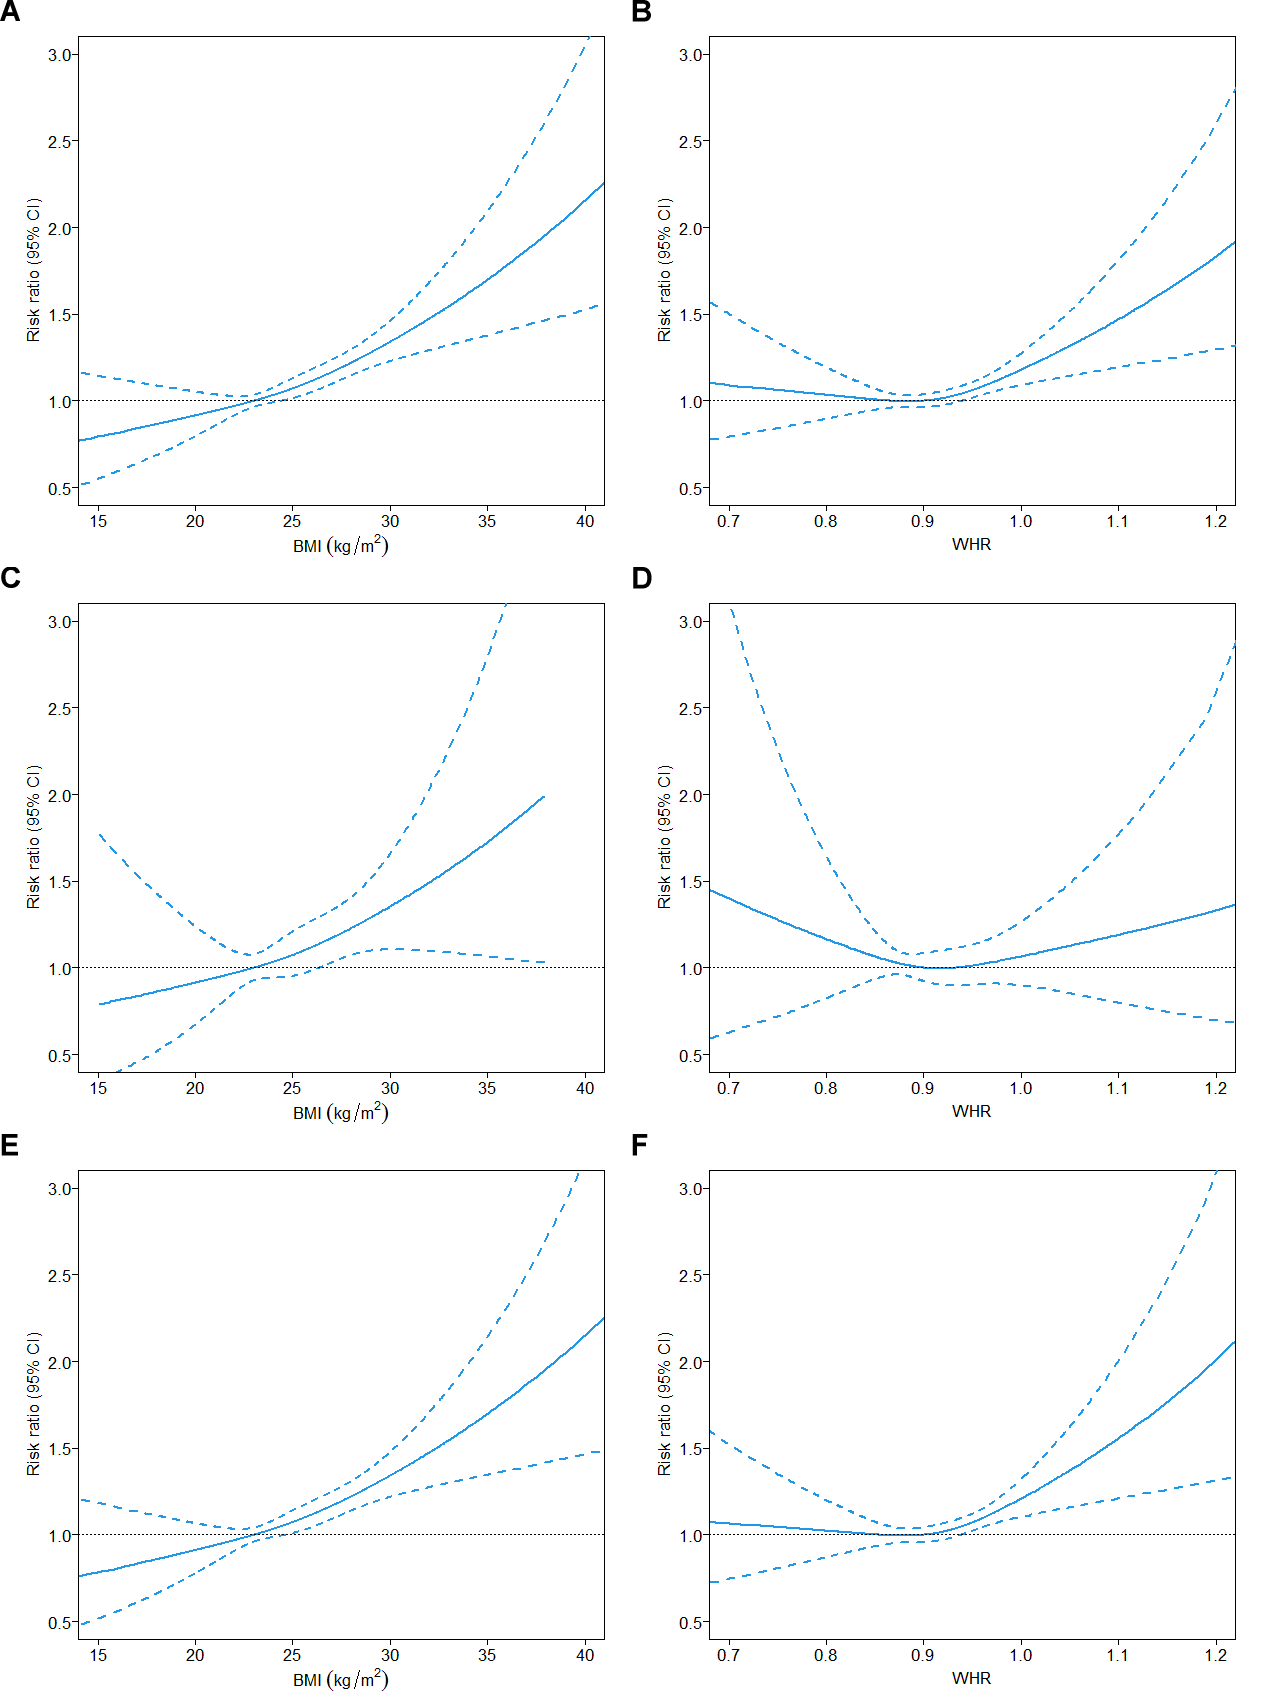
**

**Supplementary Figure 2**.Associations of BMI and WHR with prevalent DKD among overall population (A, B), patients without use of antidiabetic drugs (C, D), and patients with use of antidiabetic drugs (E, F). Data were fitted using a restricted cubic spline with 3 knots, and the reference values for BMI and WHR were set at 23 kg/m2 and 0.9, respectively. The dashed lines indicate 95% CIs. Models were adjusted for age, sex, education, smoking status, alcohol drinking, diabetes duration, HbA1c, use of antidiabetic agents (for overall population), systolic BP, use of antihypertensive agents, HDL-C, triglycerides, and WHR (or BMI). BMI, body mass index; DKD, diabetic kidney disease; WHR, waist-to-hip ratio.
